# Supplementary material for: The Insertion Green Monster (iGM) Method for Expression of Multiple Exogenous Genes in Yeast
Source: PubMed Central journal article supplement (PMC4455768; doi:10.1534/g3.114.010868), 2014-04-28
Supplement: supp_g3.114.010868_010868SI.pdf [file supp_g3.114.010868_010868SI.pdf]

## The Insertion Green Monster (iGM) Method for Expression of Multiple Exogenous Genes in Yeast

Vyacheslav M. Labunsky,<sup>\*,1</sup> Yo Suzuki,<sup>†,1</sup> Timothy J. Hanly,<sup>†</sup> Ayako Murao,<sup>†</sup> Frederick P. Roth,<sup>‡,§,2</sup> and Vadim N. Gladyshev<sup>\*,2</sup>

<sup>\*</sup>Division of Genetics, Department of Medicine, Brigham and Women's Hospital and Harvard Medical School, Boston, Massachusetts 02115, <sup>†</sup>Department of Synthetic Biology and Bioenergy, J. Craig Venter Institute, La Jolla, California 92037,

<sup>‡</sup>Donnelly Centre and Departments of Molecular Genetics and Computer Science, University of Toronto, Toronto, Ontario M5S 3E1, Canada, and <sup>§</sup>Lunenfeld-Tanenbaum Research Institute, Mt. Sinai Hospital, Toronto, Ontario M5T 3L9, Canada

<sup>1</sup>These authors contributed equally to this work.

<sup>2</sup>Corresponding authors: University of Toronto, Donnelly Centre, 160 College Street, Toronto, Ontario M5S 3E1, Canada. E-mail: fritz.roth@utoronto.ca; Division of Genetics, Department of Medicine, Brigham and Women's Hospital, 77 Avenue Louis Pasteur, Boston, MA 02115. E-mail: vgladyshev@rics.bwh.harvard.edu

**DOI: 10.1534/g3.114.010868**

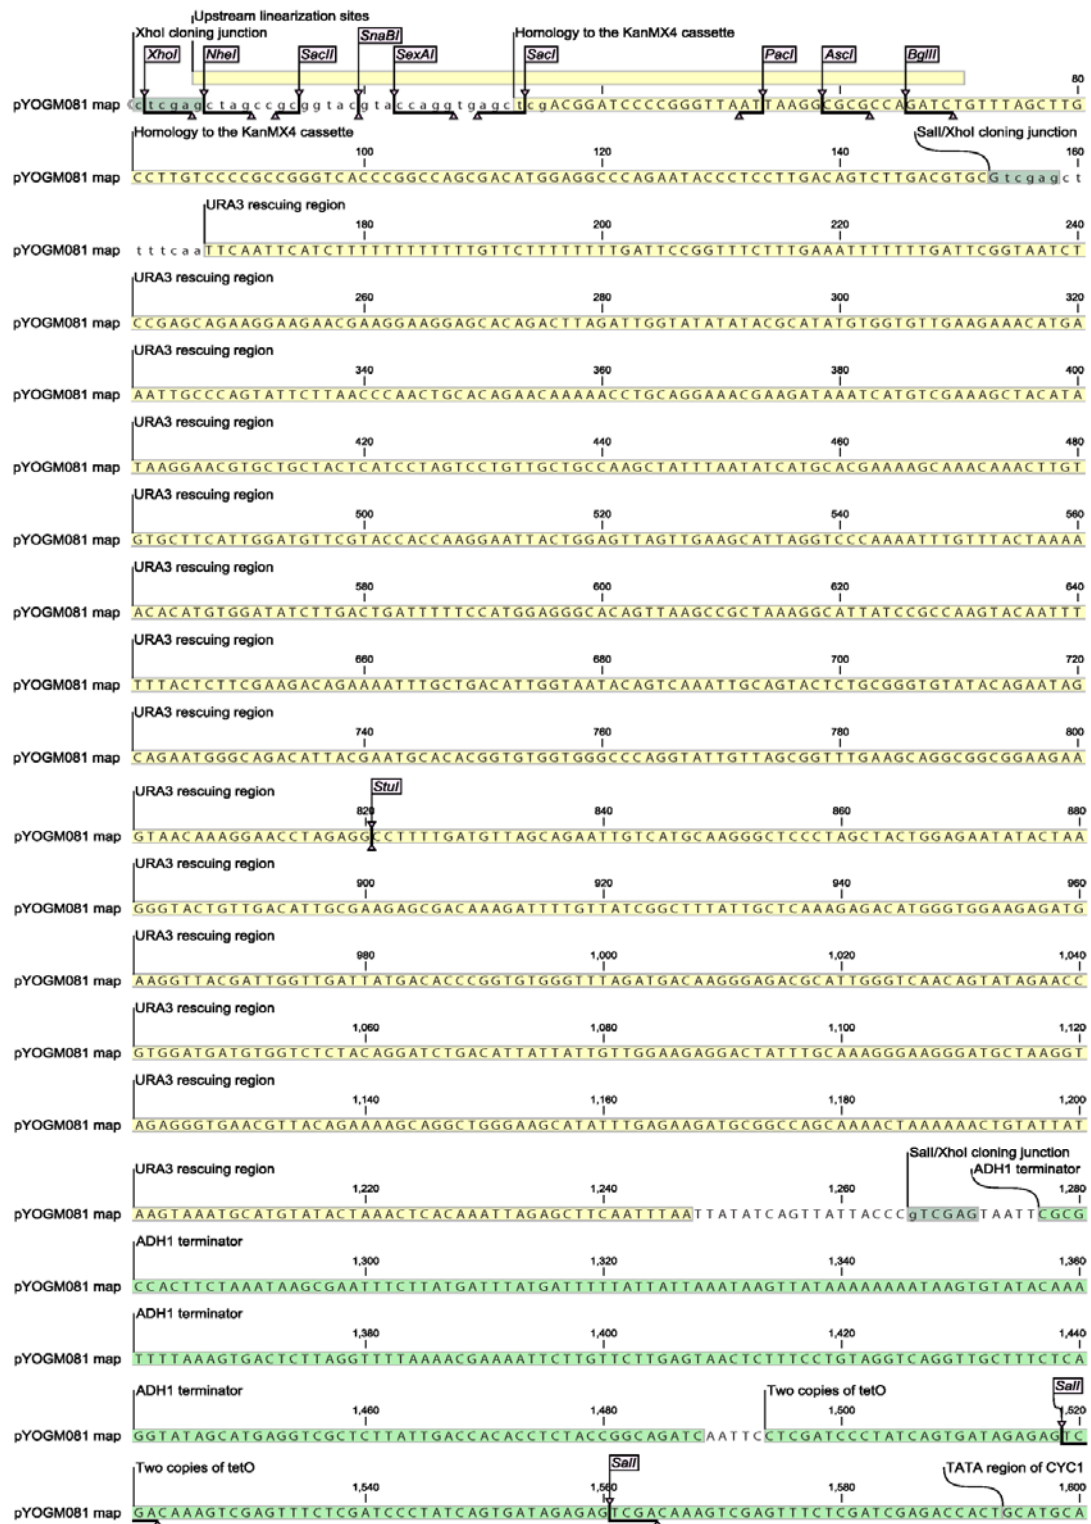

**Figure S1** Sequence of the pYOGM081 plasmid containing the iGM gene insertion module. In a version of the plasmid not containing the HA-tag (pTJH001), nucleotides 4,954–5,101 are removed and replaced with a stop codon (TAA) and a *Hind*III site (Materials and Methods). In plasmids containing the *ADH1* (pTJH002), *TEF* (pTJH003), and *CUP1* (pTJH004) promoters for driving the expression of a gene introduced between the Gateway cloning sites, nucleotides 2,755–3,232 are replaced with the respective sequences shown below (Materials and Methods).

Figure S1 (continued).

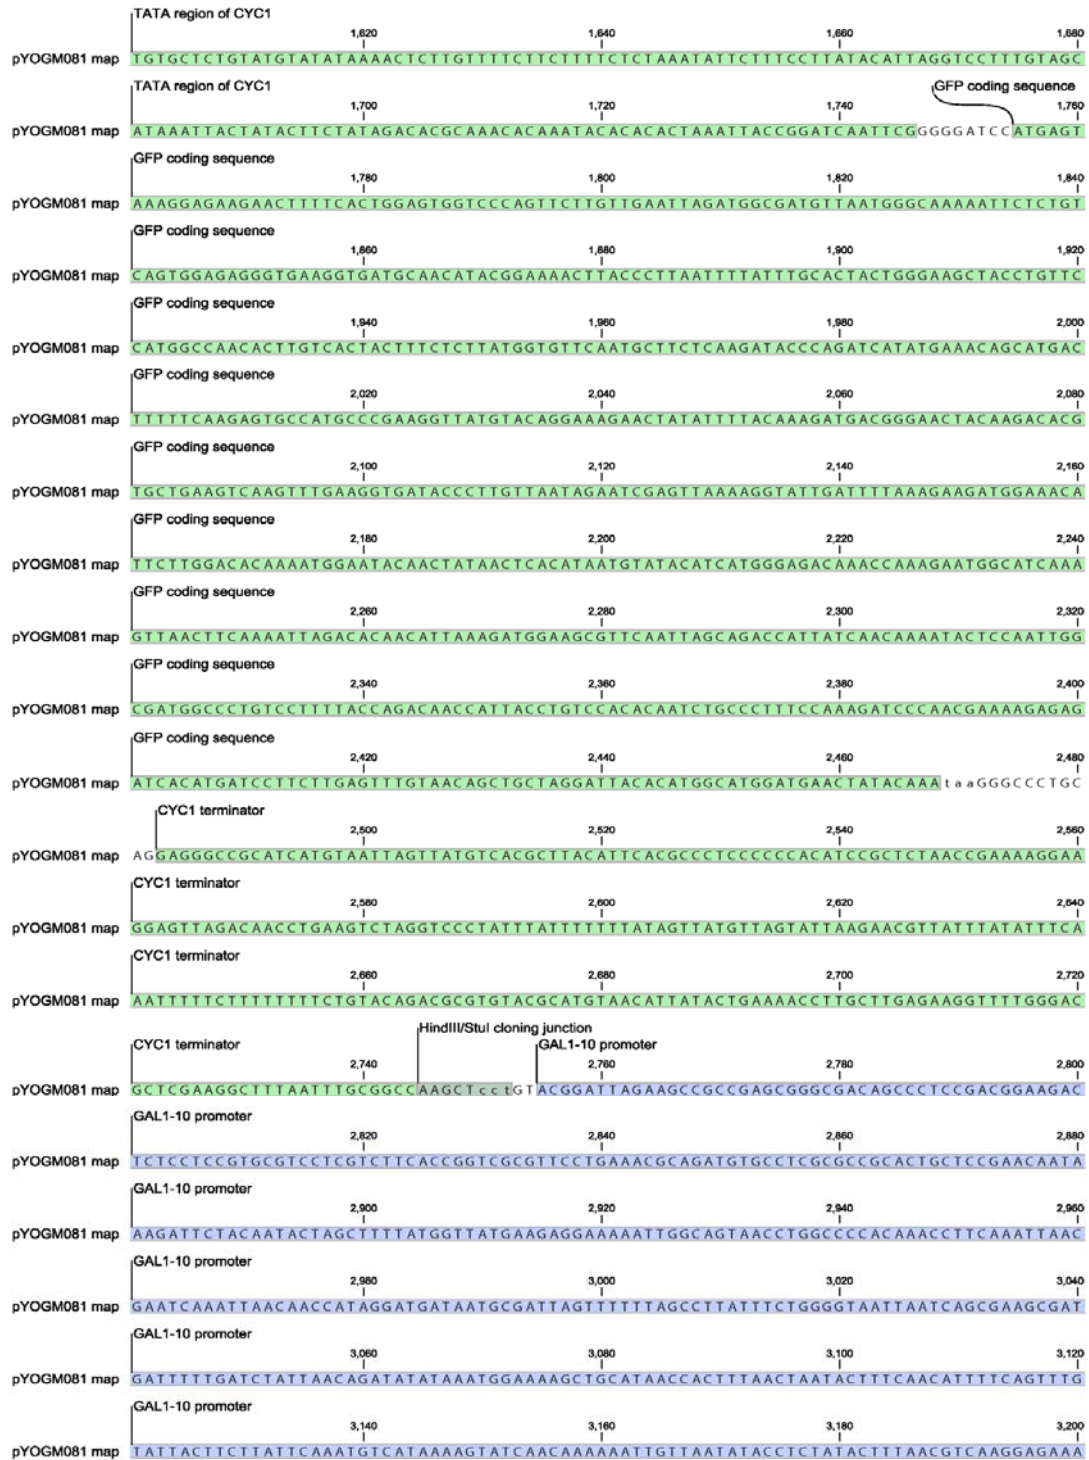

Figure S1 (continued).

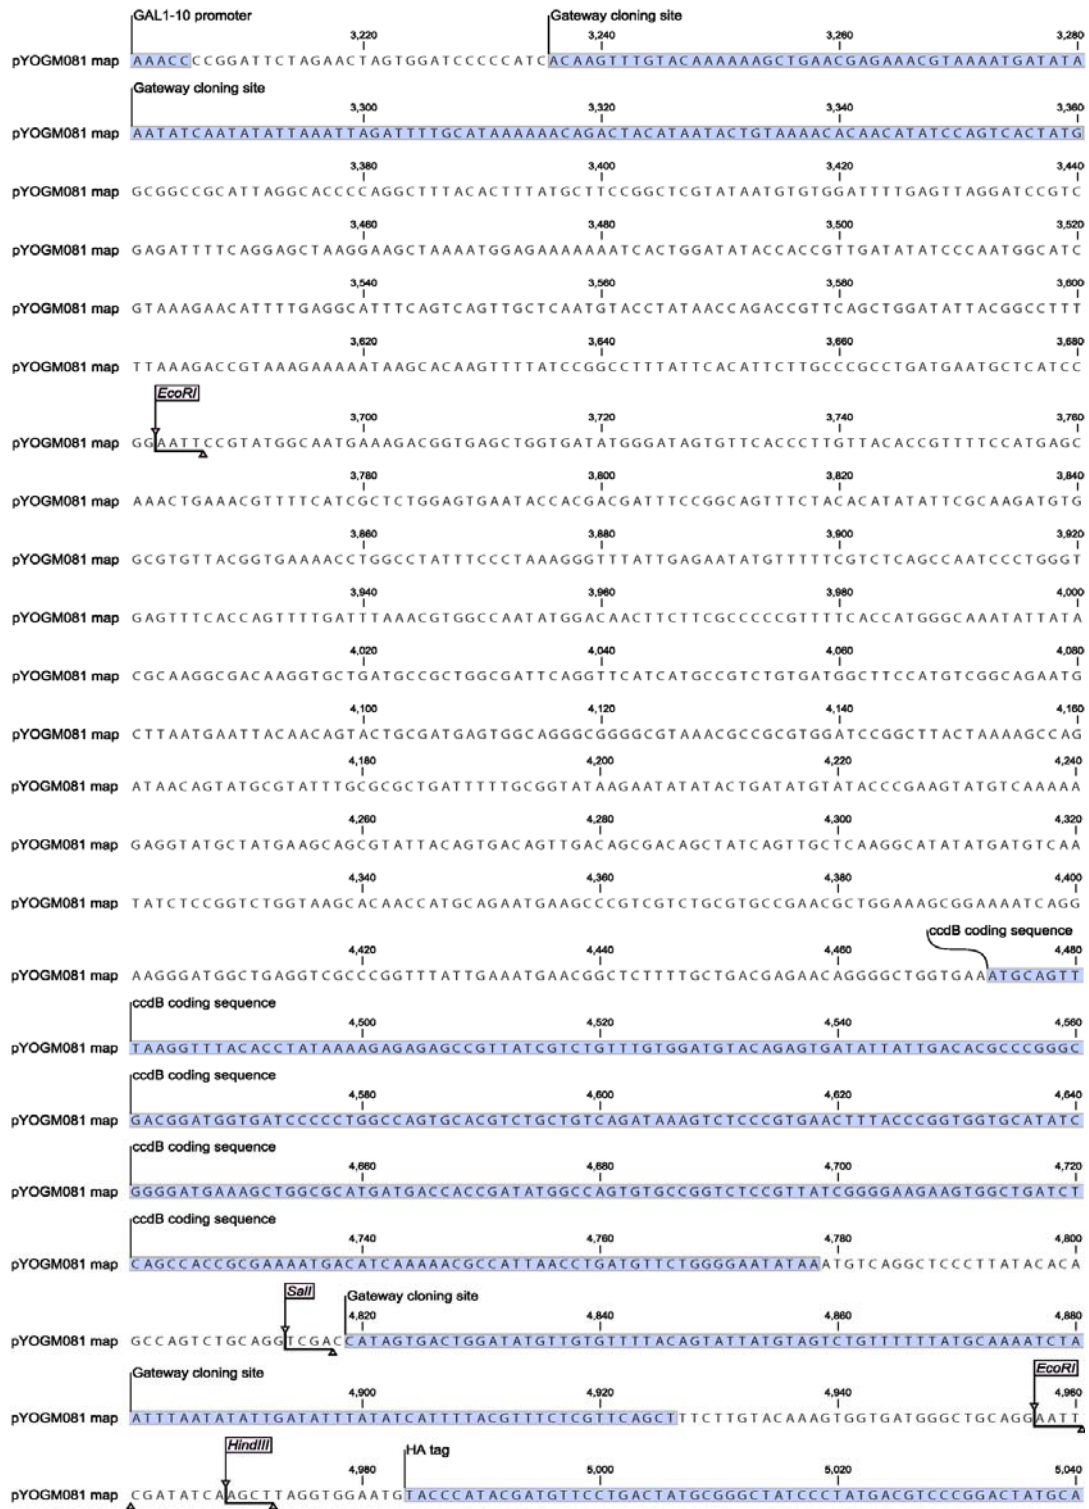

Figure S1 (continued).

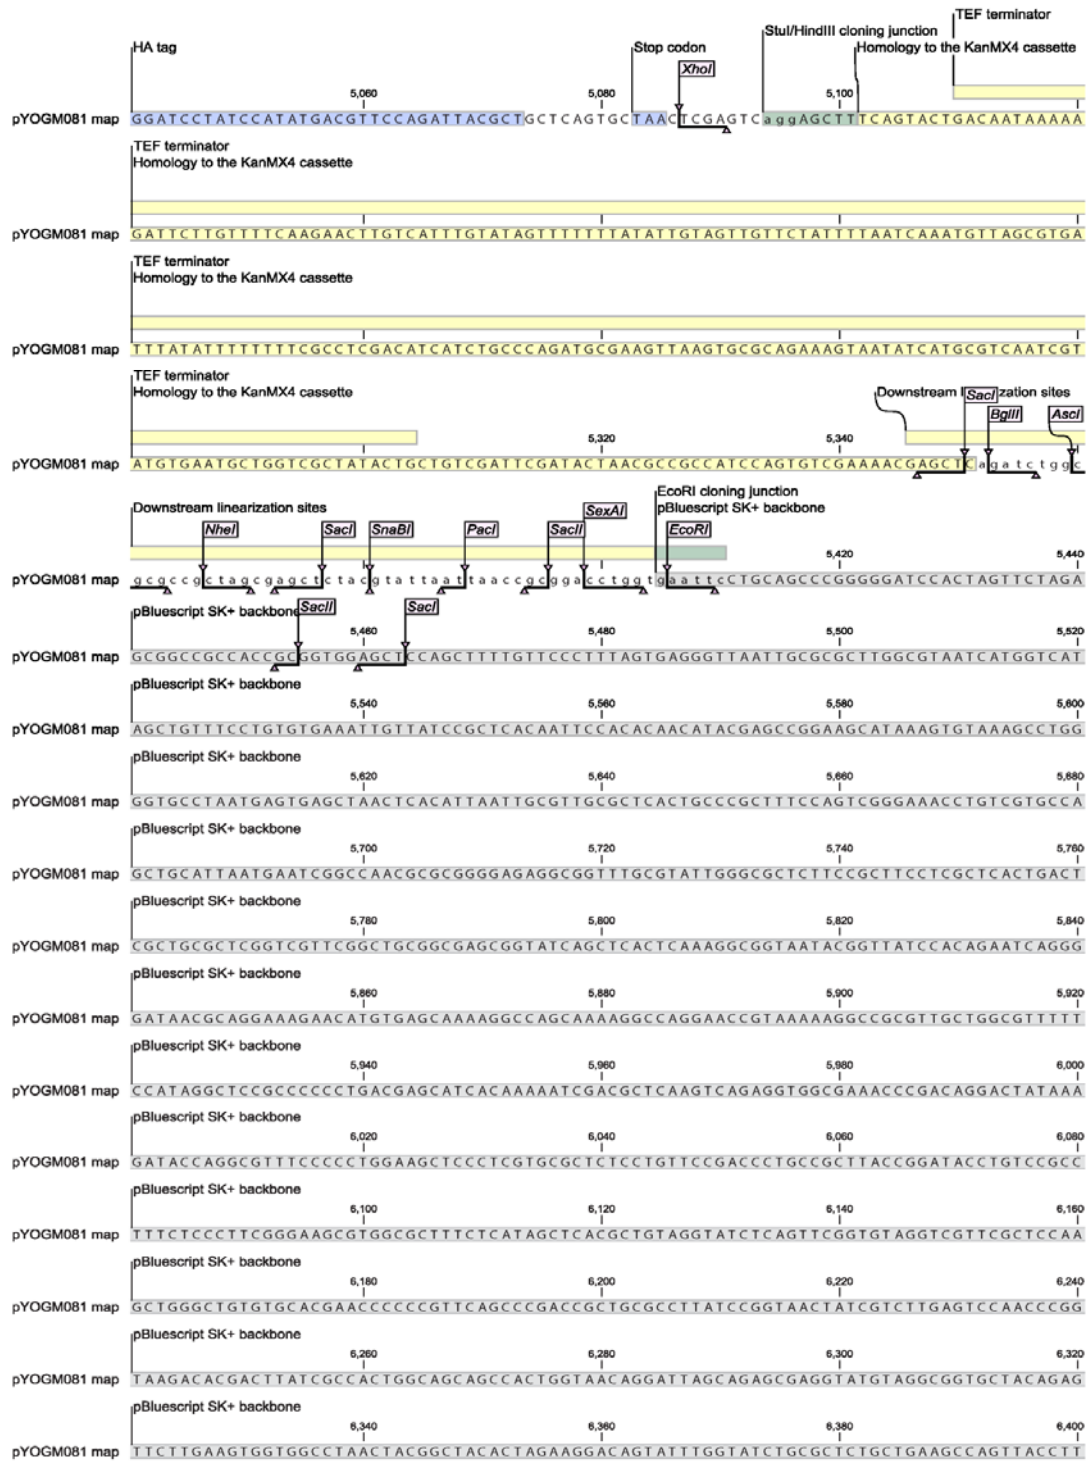



Figure S1 (continued).

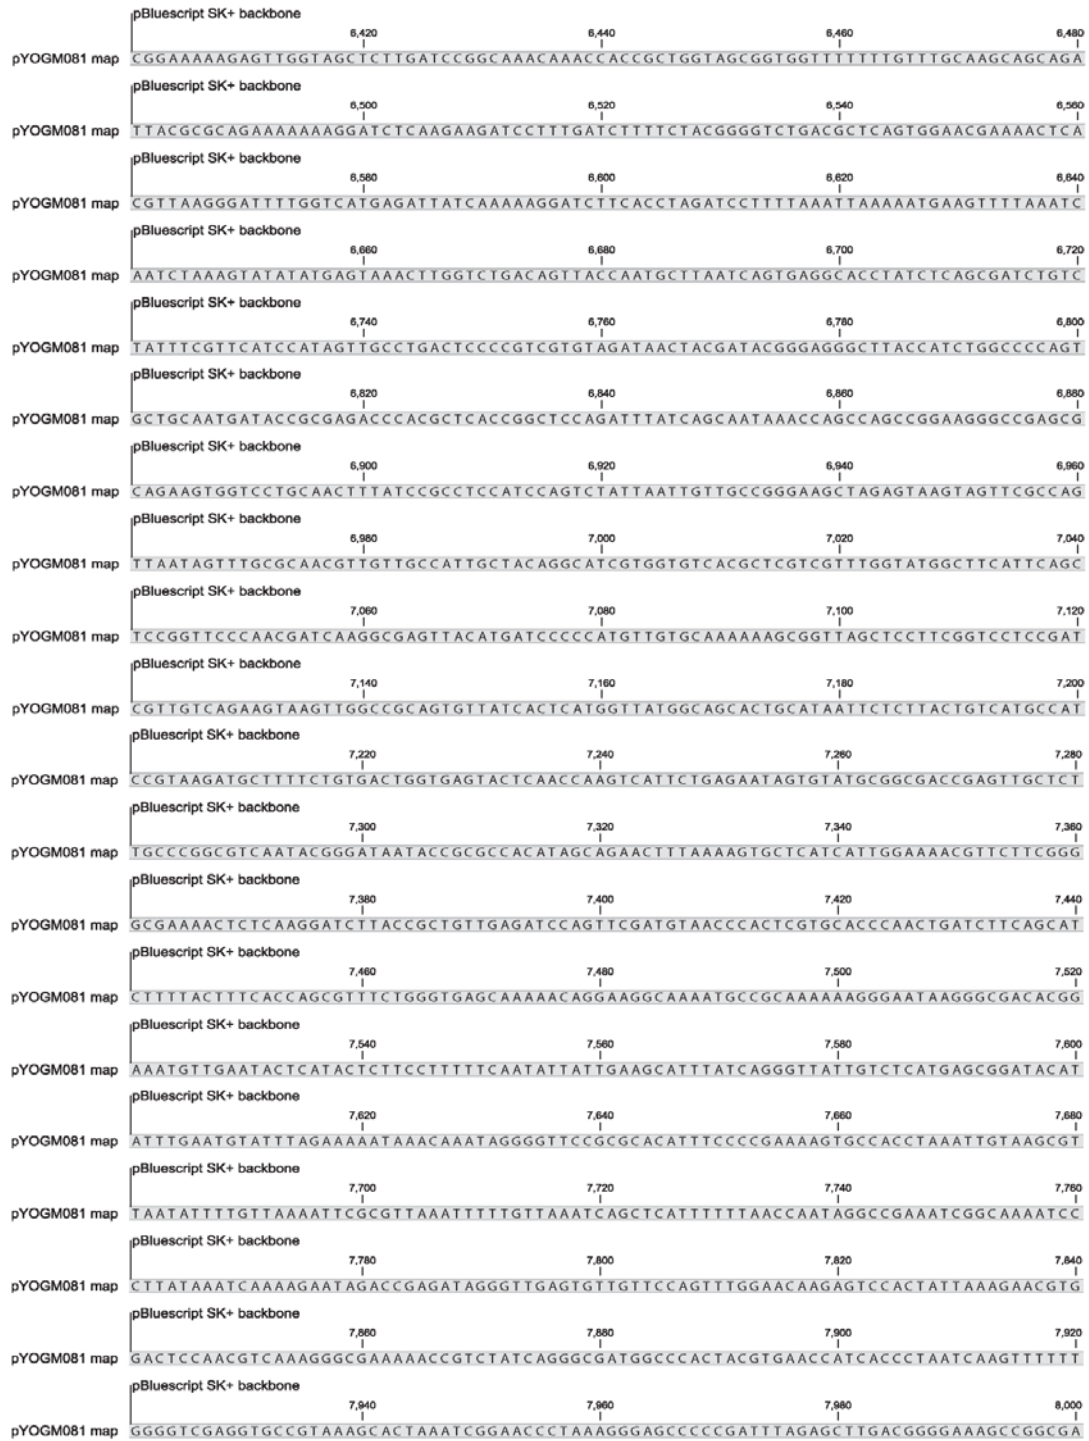

Figure S1 (continued).

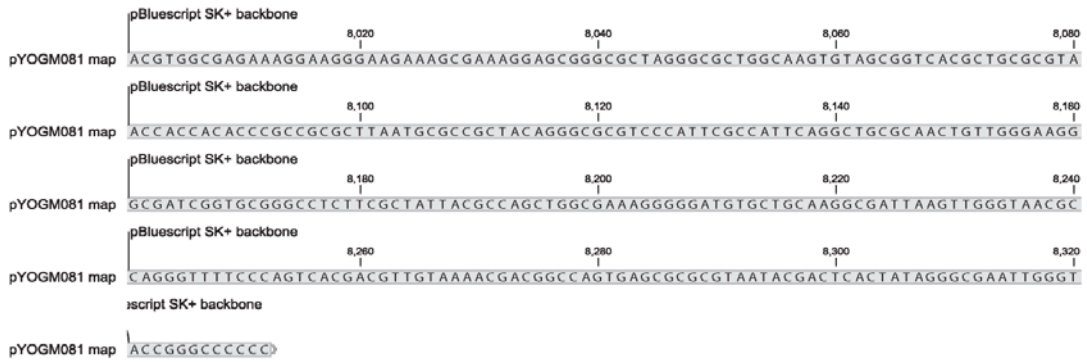

**ADH1 promoter**

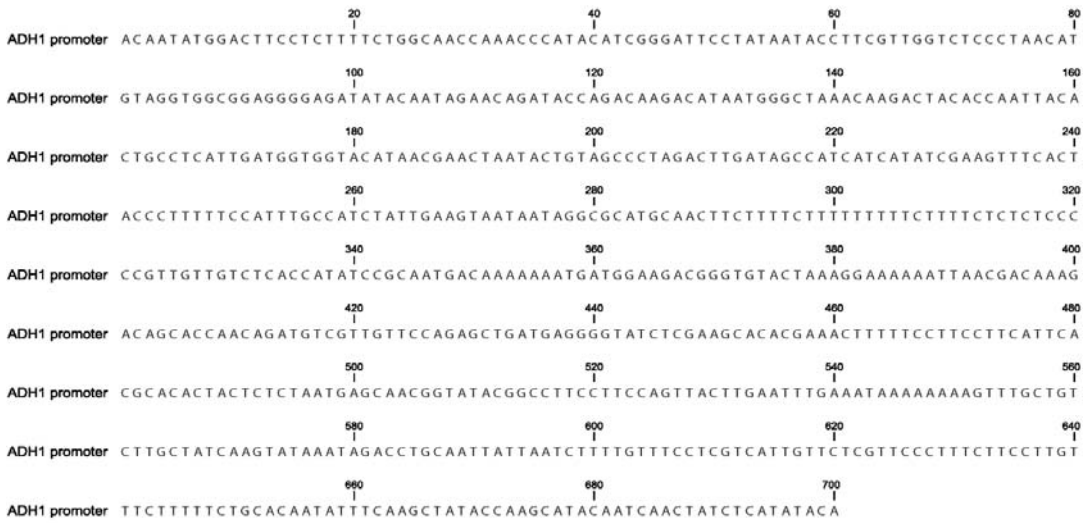

**TEF promoter**

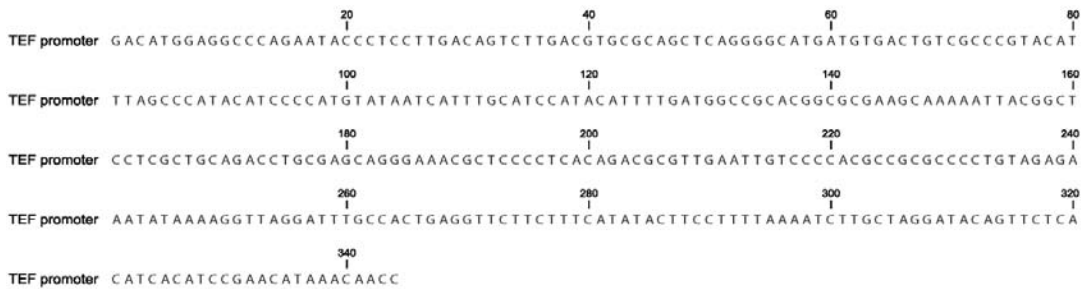

Figure S1 (continued).

**CUP1 promoter**

```

                20                40                60                80
CUP1 promoter  AACTTCAACGATTTCTATGATGCATTTTATAATTAGTAAGCCGATCCCATTACCGACATTTGGGCGCTATACGTGCATAT
                100               120               140               160
CUP1 promoter  GTTCATGTATGTATCTGTATTTAAAACACTTTTGTATTATTTTTCCTCATATATGTGTATAGGTTTATACGGATGATTTA
                180               200               220               240
CUP1 promoter  ATTATTACTTCACCACCCTTTATTTTCAGGCTGATATCTTAGCCTTGTTACTAGTTAGAAAAAGACATTTTGTGTCAGT
                260               280               300               320
CUP1 promoter  CACTGTCAAGAGATTCTTTTGTGGCATTTCCTCTAGAAGCAAAAAGAGCGATGCGTCTTTCCGCTGAACCGTTCCAGC
                340               360               380               400
CUP1 promoter  AAAAAAGACTACCAACGCAATATGGATTGTCAGAATCATATAAAAGAGAAGCAAATAACTCCTTGTCTTGTATCAATTGC
                420               440               460               480
CUP1 promoter  ATTATAATATCTTCTTGTAGTGCAATATCATATAGAAGTCATCGAAATAGATATTAAAGAAAAACAACTGTACAATCAA
                500
CUP1 promoter  TCAATCAATCATCACATAAA
```



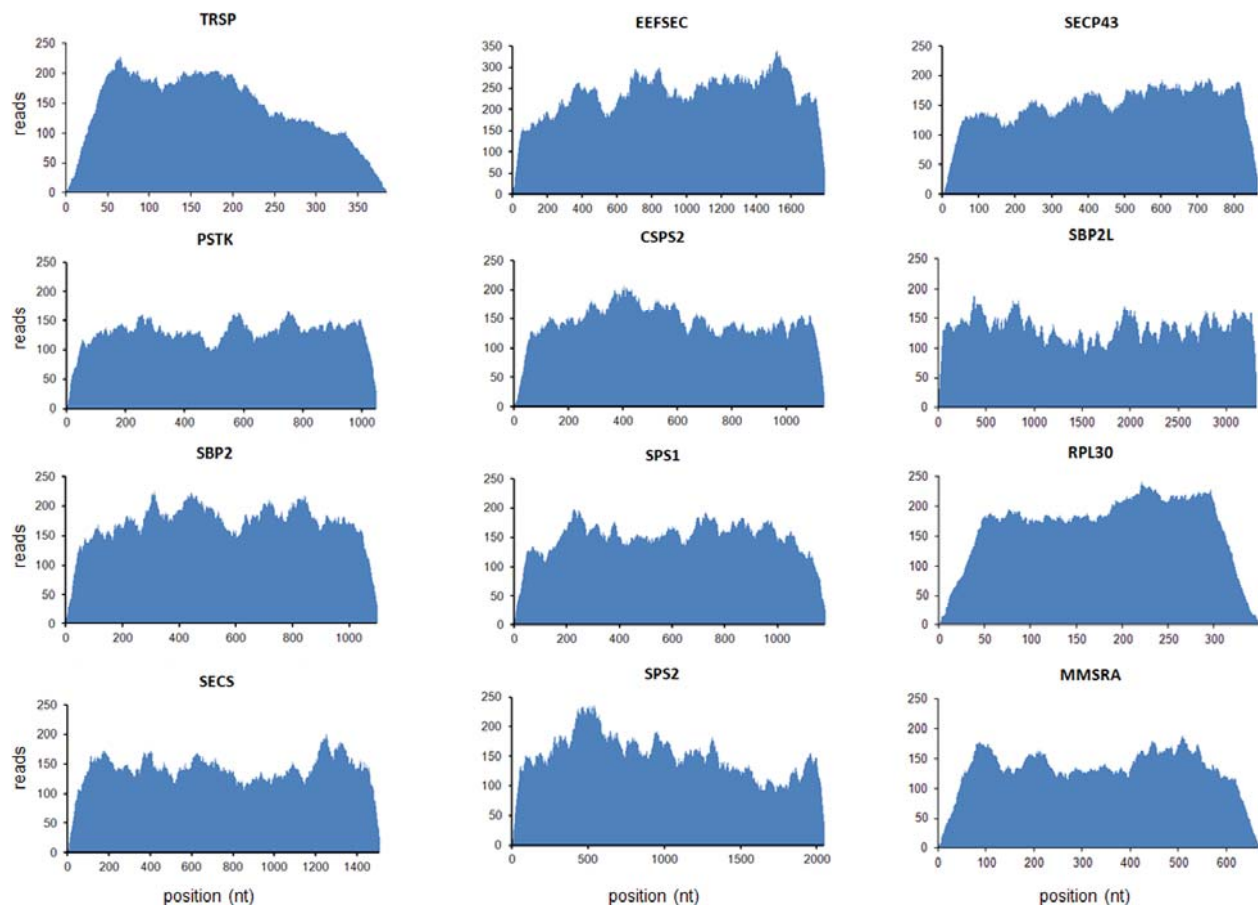

**Figure S2** Integration of the metazoan Sec biosynthesis and insertion genes into the yeast genome. Panels show read coverage of exogenous genes introduced using iGM method. Coverage density maps were generated by aligning reads obtained by sequencing the whole genome of the iGM11 mutant to the sequences of the introduced exogenous genes. The entire ORF of the gene beginning from the ATG start codon and ending at the stop codon were used for alignment. For SPS2, which is a selenoprotein, its ORF together with 3'-UTR flanking region containing a SECIS element was used to generate the coverage map.

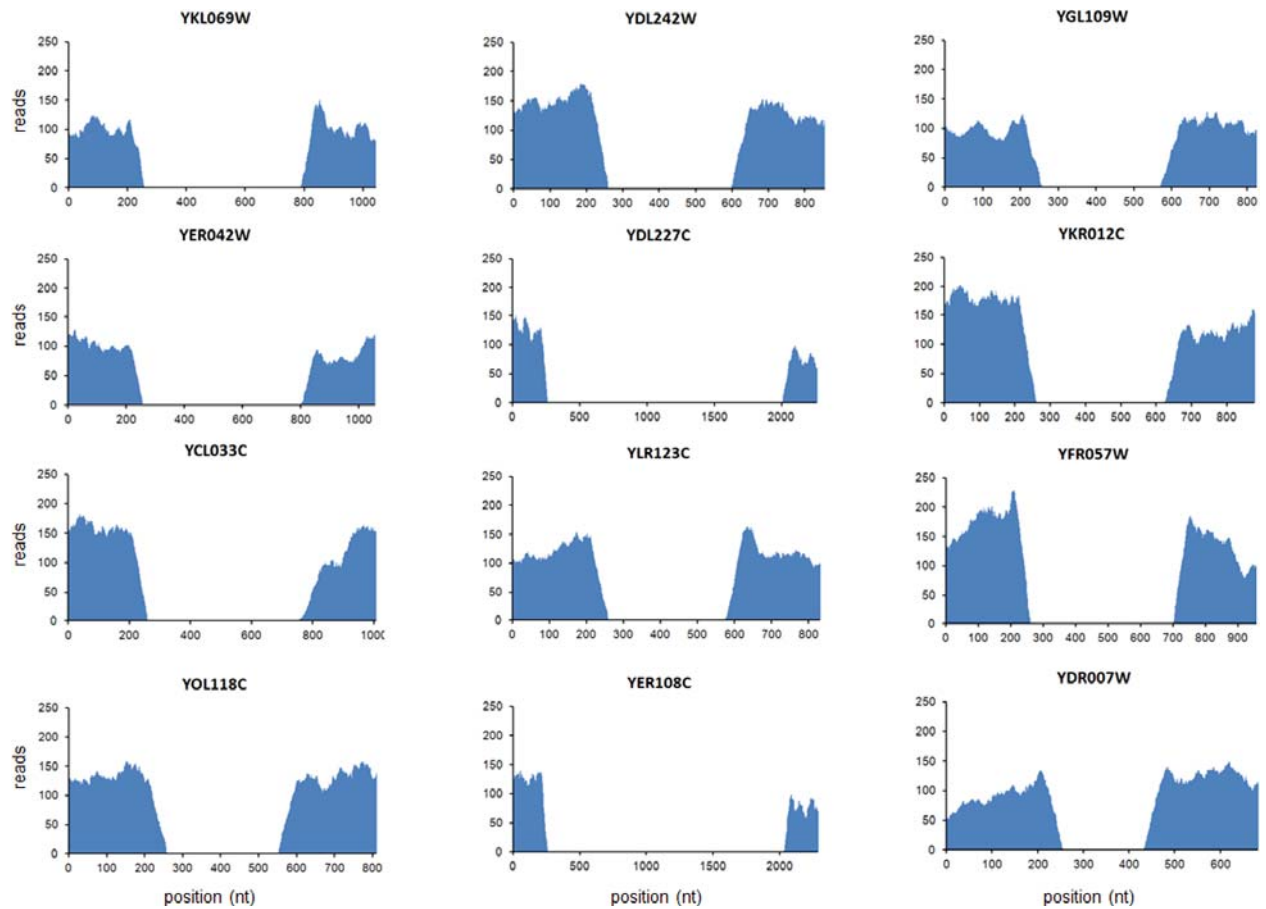

**Figure S3** Sequencing of the whole genome confirms deletion of the yeast genes. Panels show read coverage of endogenous genes that were replaced by inserted genes. Coverage density maps were generated by aligning reads obtained by sequencing the whole genome of the iGM11 mutant to the sequences of the deleted genes together with 250 bp 5'-UTR and 250 bp 3'-UTR flanking regions.

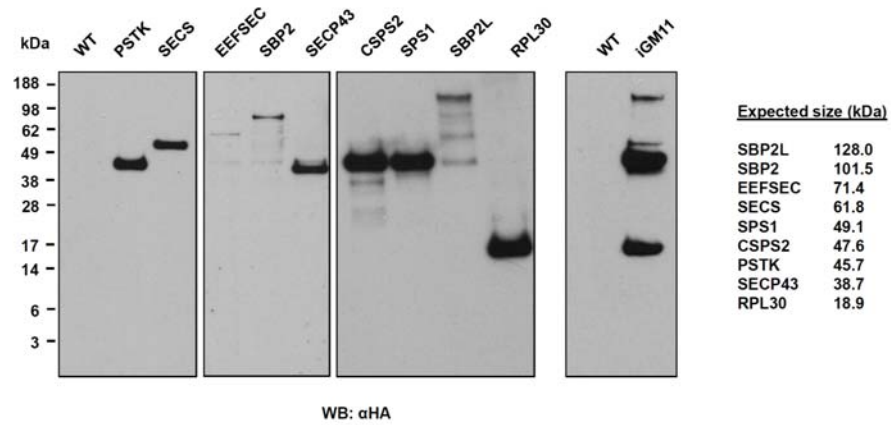

**Figure S4** Expression analysis of the exogenous genes introduced into the yeast genome using iGM method. Expression of proteins carrying HA-tag upon culture of cells in the presence of galactose was detected in individual ProMonster strains and a strain containing all of the 11 gene insertions (iGM11) by Western blotting with HA-tag specific antibodies. Expected sizes of proteins are shown on the right.

**Table S1 PCR primers used for generating a universal gene insertion module.**

| Primer sequence                                                                                                                                                                   | Template                                                                                                               |
|-----------------------------------------------------------------------------------------------------------------------------------------------------------------------------------|------------------------------------------------------------------------------------------------------------------------|
| <b>Fragment 1</b>                                                                                                                                                                 |                                                                                                                        |
| <b>1st round</b><br>5'-CAGAAGCTT(HindIII)TCAGTACTGACAATAAAAAGATTC-3'<br>5'-TAGAGCTC(SacI)GCTAGC(NheI)GGCGCGCCAGATCT(BglII)<br>GAGCTC(SacI)GTTTTCGACAC-3'                          | Template for the first round of PCR: pAG25 (Goldstein and McCusker 1999)                                               |
| <b>2nd round</b><br>5'-CAGAAGCTT(HindIII)TCAGTACTGACAATAAAAAGATTC-3'<br>5'-GGAATTC(EcoRI)ACCAGGT(SexAI)CCGCGG(SacII)TTAATTA<br>A(PacI)TACGTA(SnaBI)GAGCTC(SacI)GCTAG-3'           | To extend the downstream end, the product of the first round of PCR was used as a template for the second round of PCR |
| <b>Fragment 2</b>                                                                                                                                                                 |                                                                                                                        |
| 5'-CCGCTCGAG(XhoI)CTAGC(NheI)CGCGG(SacII)TACGTA(SnaBI)<br>CCAGGT(SexAI)GAGCTC(SacI)GACGGATCCCCGGGTAA-3'<br>5'-CCCAAGCTT(HindIII)GGGATATCGCGTCGAC(SalI)GCACGTC<br>AAGACTGTCAAGG-3' | pAG25 (Goldstein and McCusker 1999)                                                                                    |
| <b>Fragment 3</b>                                                                                                                                                                 |                                                                                                                        |
| 5'-CCGCTCGAG(XhoI)CTTTTCAATTCAATTCATC-3'<br>5'-CCCAAGCTT(HindIII)GGGATATCGCGTCGAC(SalI)GGGTAAT<br>AACTGATATAAT-3'                                                                 | pYOGM057 with the <i>URA3</i> sequence derived from pRS316 (Sikorski and Hieter 1989)                                  |
| <b>Fragment 4</b>                                                                                                                                                                 |                                                                                                                        |
| PCR was not used for this fragment                                                                                                                                                |                                                                                                                        |
| <b>Fragment 5</b>                                                                                                                                                                 |                                                                                                                        |
| 5'-GAAGGCCT(StuI)GTACGGATTAGAAGCCGCCGAG-3'<br>5'-GAAGGCCT(StuI)GACTCGAGTTAGCACTGAGC-3'                                                                                            | pAG416GAL-ccdB-HA (Alberti <i>et al.</i> 2007)                                                                         |
| <b>HA-less construct</b>                                                                                                                                                          |                                                                                                                        |
| HAless-HindIII_F 5'-GACTAAGCTT(HindIII)TCAGTACTGACAATAAAAAGATTCTTG-3'<br>HAless-HindIII_R 5'-GACTAAGCTT(HindIII)TTA(Stop)GCAGCCCATCACTTTG-3'                                      | pYOGM081                                                                                                               |
| <b>Construct with the <i>ADH1</i> promoter</b>                                                                                                                                    |                                                                                                                        |
| ADH1pr_Fwd 5'-TGCGGCCAAGCTCCTGTACAATATGGACTTCTCTTTTCTG-3'<br>ADH1pr_Rev 5'-GCTTTTTTGTACAAACTTGTGATTGTATATGAGATAGTTGATTG-3'                                                        | BY4741 genomic DNA                                                                                                     |
| ADH1pr_pYOGM081_Fwd 5'-CTATCATATACAATCACAAGTTTGTACAAAAAAGCTGAACG-3'<br>ADH1pr_pYOGM081_Rev 5'-GAGGAAGTCCATATTGTACAGGAGCTTGCCGCAAATTAAG-3'                                         | pYOGM081                                                                                                               |
| <b>Construct with the <i>TEF</i> promoter</b>                                                                                                                                     |                                                                                                                        |
| TEFpr_Fwd 5'-TGCGGCCAAGCTCCTGTGACATGGAGGCCAGAATACCCTC-3'<br>TEFpr_Rev 5'-GCTTTTTTGTACAAACTTGTGATGGTTGTTTATGTTTCGGATGTG-3'                                                         | pFA6a-kanMX4 (Wach <i>et al.</i> 1994)                                                                                 |
| TEFpr_pYOGM081_Fwd 5'-CCGAACATAAACAACCATCACAAGTTTGTACAAAAAAGCTGAAC-3'<br>TEFpr_pYOGM081_Rev 5'-CTGGCCCTCCATGTCACAGGAGCTTGCCGCAAATTAAGCC-3'                                        | pYOGM081                                                                                                               |
| <b>Construct with the <i>CUP1</i> promoter</b>                                                                                                                                    |                                                                                                                        |
| CUP1pr_Fwd 5'-GCTTTAATTTGCGGCCAAGCTCCTGTAACCTCAACGATTTCTATGATGC-3'<br>CUP1pr_Rev 5'-CAGCTTTTTGTACAAACTTGTGATTTTATGTGATGATTGATTG-3'                                                | BY4741 genomic DNA                                                                                                     |
| CUP1pr_pYOGM081_Fwd 5'-CAATCATCACATAAAAATCACAAGTTTGTACAAAAAAGC<br>TGAACGAGAAACG-3'<br>CUP1pr_pYOGM081_Rev 5'-CATAGAAATCGTTGAAGTTACAGGAGCTTGCCGCAAA<br>TTAAGCCTTC-3'               | pYOGM081                                                                                                               |

**Table S2 List of genotyping primers used in this study.**

| Deleted ORF    | Gene insertion | Primer sequence                                                 |
|----------------|----------------|-----------------------------------------------------------------|
| <i>YKL069W</i> | TRSP           | 5'-TAGCGACAGAGTGGTTCAATTC-3'<br>5'-TCAATTTGGCGAACAGGGAATG-3'    |
| <i>YER042W</i> | PSTK           | 5'-AGTGTTGCAGAATCGAGAAGAG-3'<br>5'-TCATAAATAAGGGCACGTACAC-3'    |
| <i>YOL118C</i> | SECS           | 5'-ACACATACCAGGATGCTTCTTC-3'<br>5'-GCTGACTAATTTGAAGCTATCG-3'    |
| <i>YLR123C</i> | SPS1           | 5'-ACAGCCAGAATCATAGACAAAC-3'<br>5'-TTCAGCTGATGTGCCATGTAAC-3'    |
| <i>YER108C</i> | SPS2           | 5'-GATGTTAAGTCTTTTGCGGCAG-3'<br>5'-AAAGTCGTTGCTGTGAAAATGG-3'    |
| <i>YCL033C</i> | SBP2           | 5'-AAGAATCCTTGGAGGCTTCAAC-3'<br>5'-GTCCACGATCTCAAACCTTTC-3'     |
| <i>YKR012C</i> | SBP2L          | 5'-TTACACAACGCAAACACTACGTAC-3'<br>5'-TTAGGACCATCTTGCAATTTGAG-3' |
| <i>YDL242W</i> | EEFSEC         | 5'-TCAAGCGTTATGTCTTCGACAC-3'<br>5'-GTTTCGATATTCGCACATTTGC-3'    |
| <i>YGL109W</i> | SECP43         | 5'-ACAAGGAGTTCATGGAACAGAG-3'<br>5'-CAACTAAAGAGTACAACGTCC-3'     |
| <i>YFR057W</i> | RPL30          | 5'-CTCTGACATCATTAGAAGCATG-3'<br>5'-AGATAACTCTGAACTGTGCATC-3'    |
| <i>YDL227C</i> | cSPS2          | 5'-CTCTGTTCCCTCTCATATTTAC-3'<br>5'-CTACTCCAGCATTCTAGTTAAG-3'    |

**SUPPLEMENTARY REFERENCES**

- Alberti, S., A. D. Gitler, and S. Lindquist, 2007 A suite of Gateway cloning vectors for high-throughput genetic analysis in *Saccharomyces cerevisiae*. *Yeast* 24: 913-919.
- Goldstein, A. L., and J. H. McCusker, 1999 Three new dominant drug resistance cassettes for gene disruption in *Saccharomyces cerevisiae*. *Yeast* 15: 1541-1553.
- Sikorski, R. S., and P. Hieter, 1989 A system of shuttle vectors and yeast host strains designed for efficient manipulation of DNA in *Saccharomyces cerevisiae*. *Genetics* 122: 19-27.
- Wach, A., A. Brachat, R. Pohlmann, and P. Philippsen, 1994 New heterologous modules for classical or PCR-based gene disruptions in *Saccharomyces cerevisiae*. *Yeast* 10: 1793-1808.
