# Supplementary material for: The Insertion Green Monster (iGM) Method for Expression of Multiple Exogenous Genes in Yeast
Source: PubMed Central journal article supplement (PMC4455768; doi:10.1534/g3.114.010868), 2014-04-28
Supplement: supp_g3.114.010868_FigureS1.pdf [file supp_g3.114.010868_FigureS1.pdf]

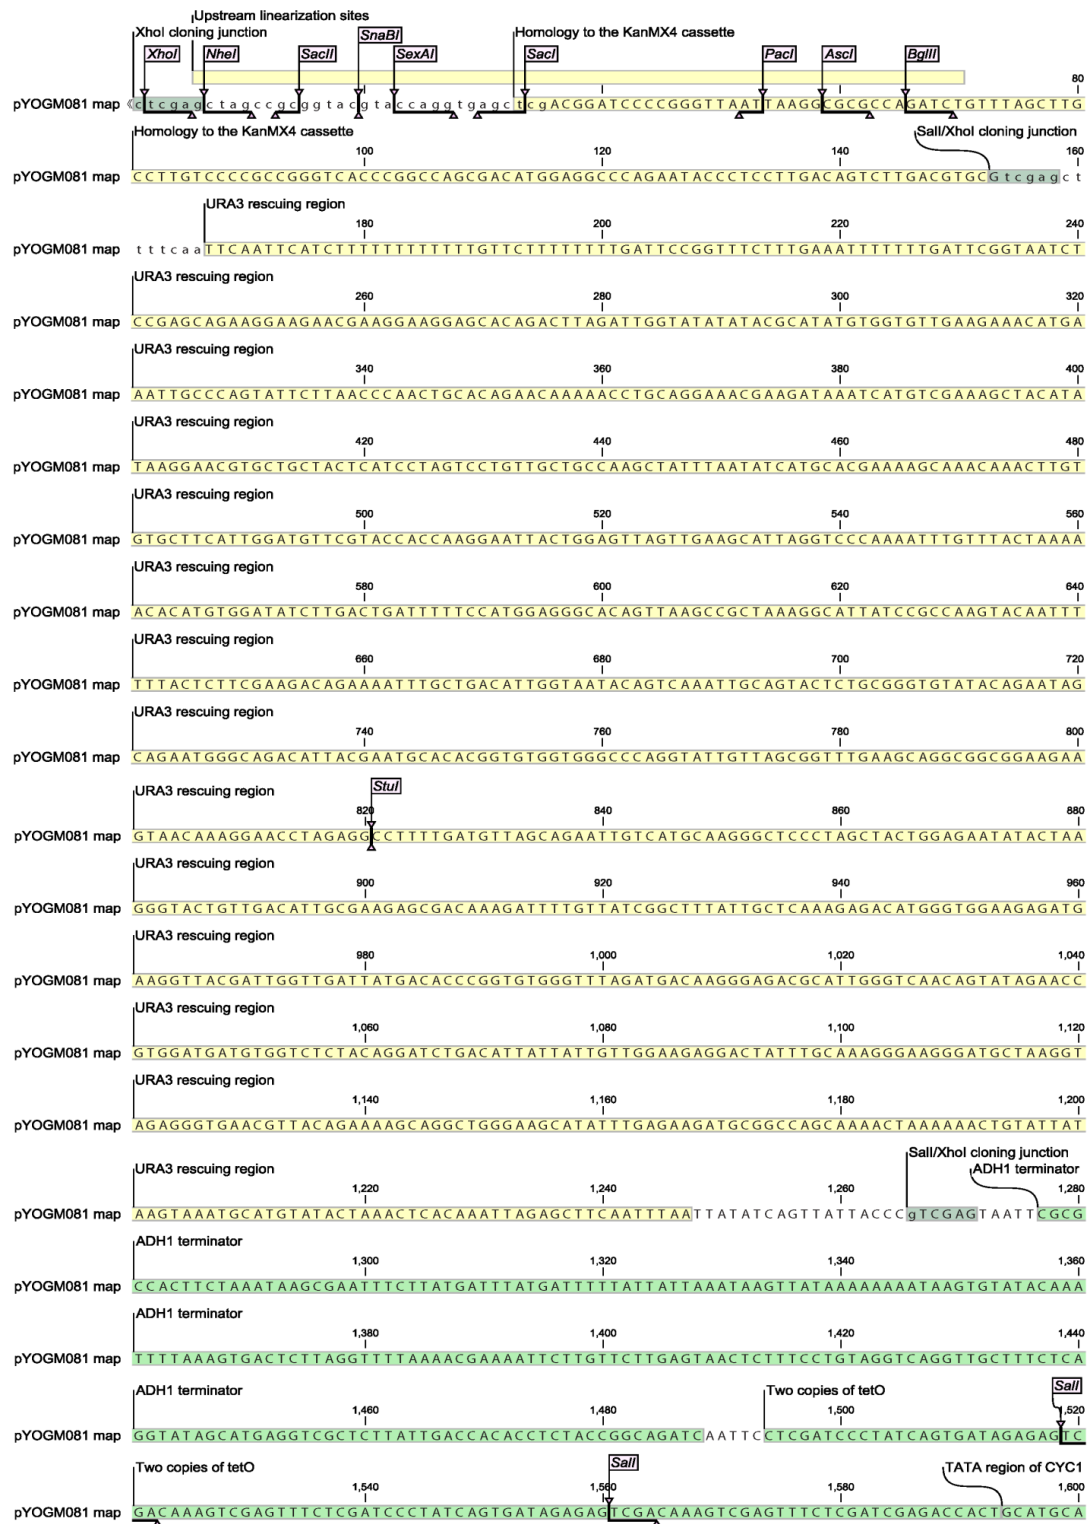

**Figure S1** Sequence of the pYOGM081 plasmid containing the iGM gene insertion module. In a version of the plasmid not containing the HA-tag (pTJH001), nucleotides 4,954–5,101 are removed and replaced with a stop codon (TAA) and a *Hind*III site (Materials and Methods). In plasmids containing the *ADH1* (pTJH002), *TEF* (pTJH003), and *CUP1* (pTJH004) promoters for driving the expression of a gene introduced between the Gateway cloning sites, nucleotides 2,755–3,232 are replaced with the respective sequences shown below (Materials and Methods).

Figure S1 (continued).

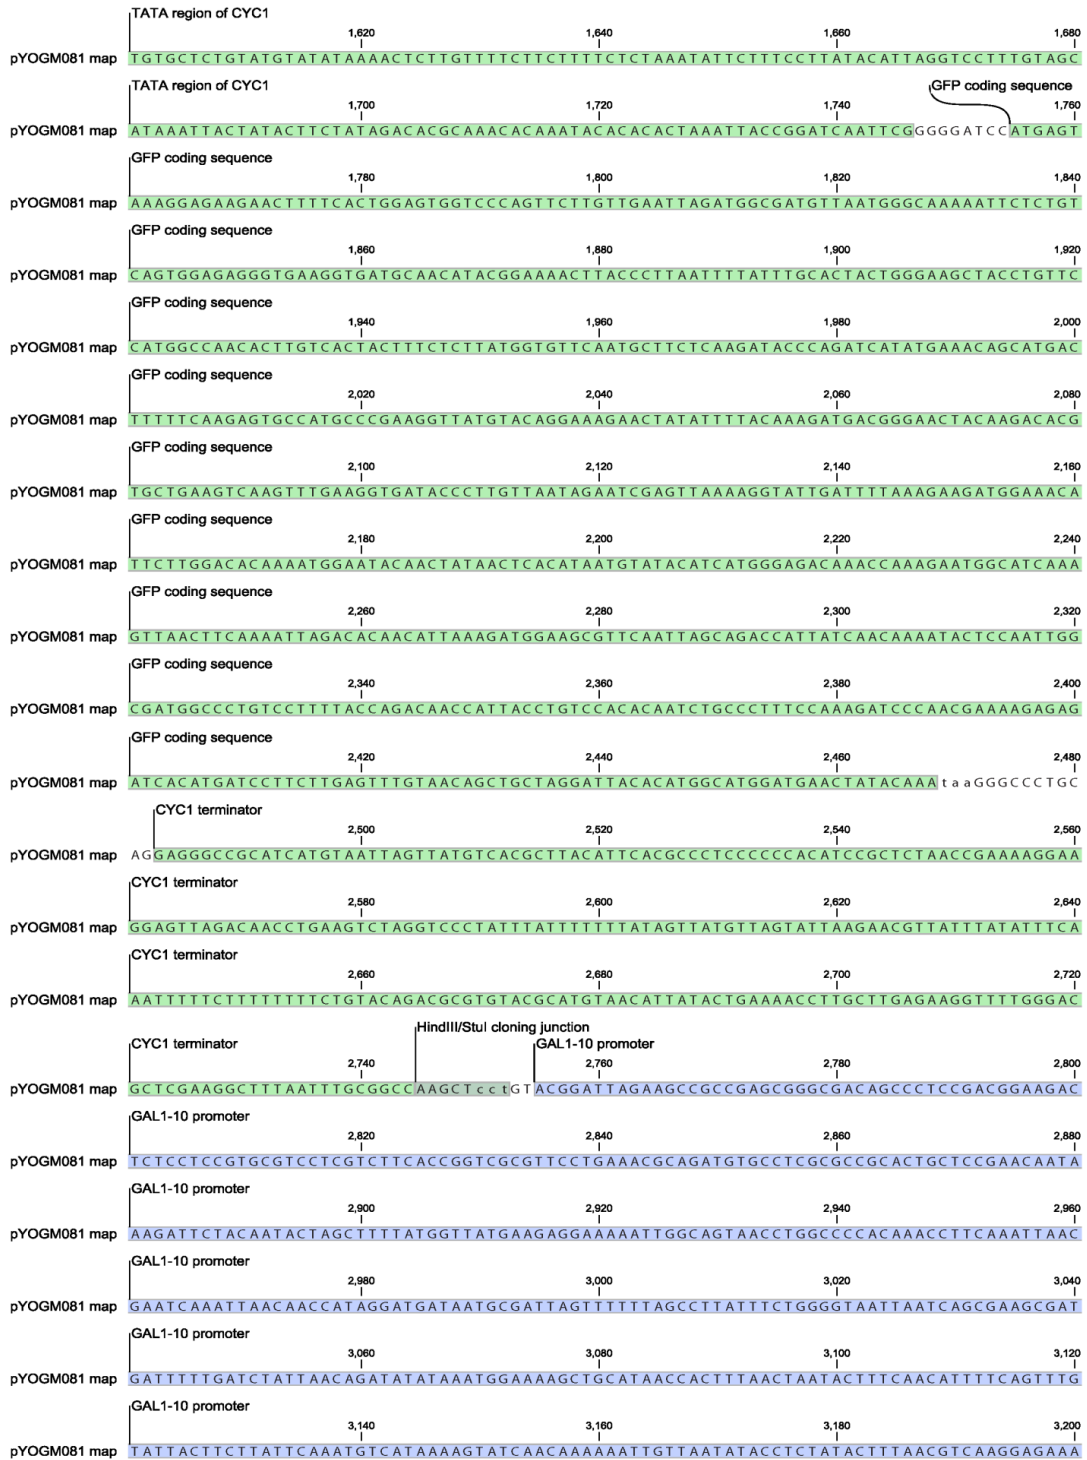

Figure S1 (continued).

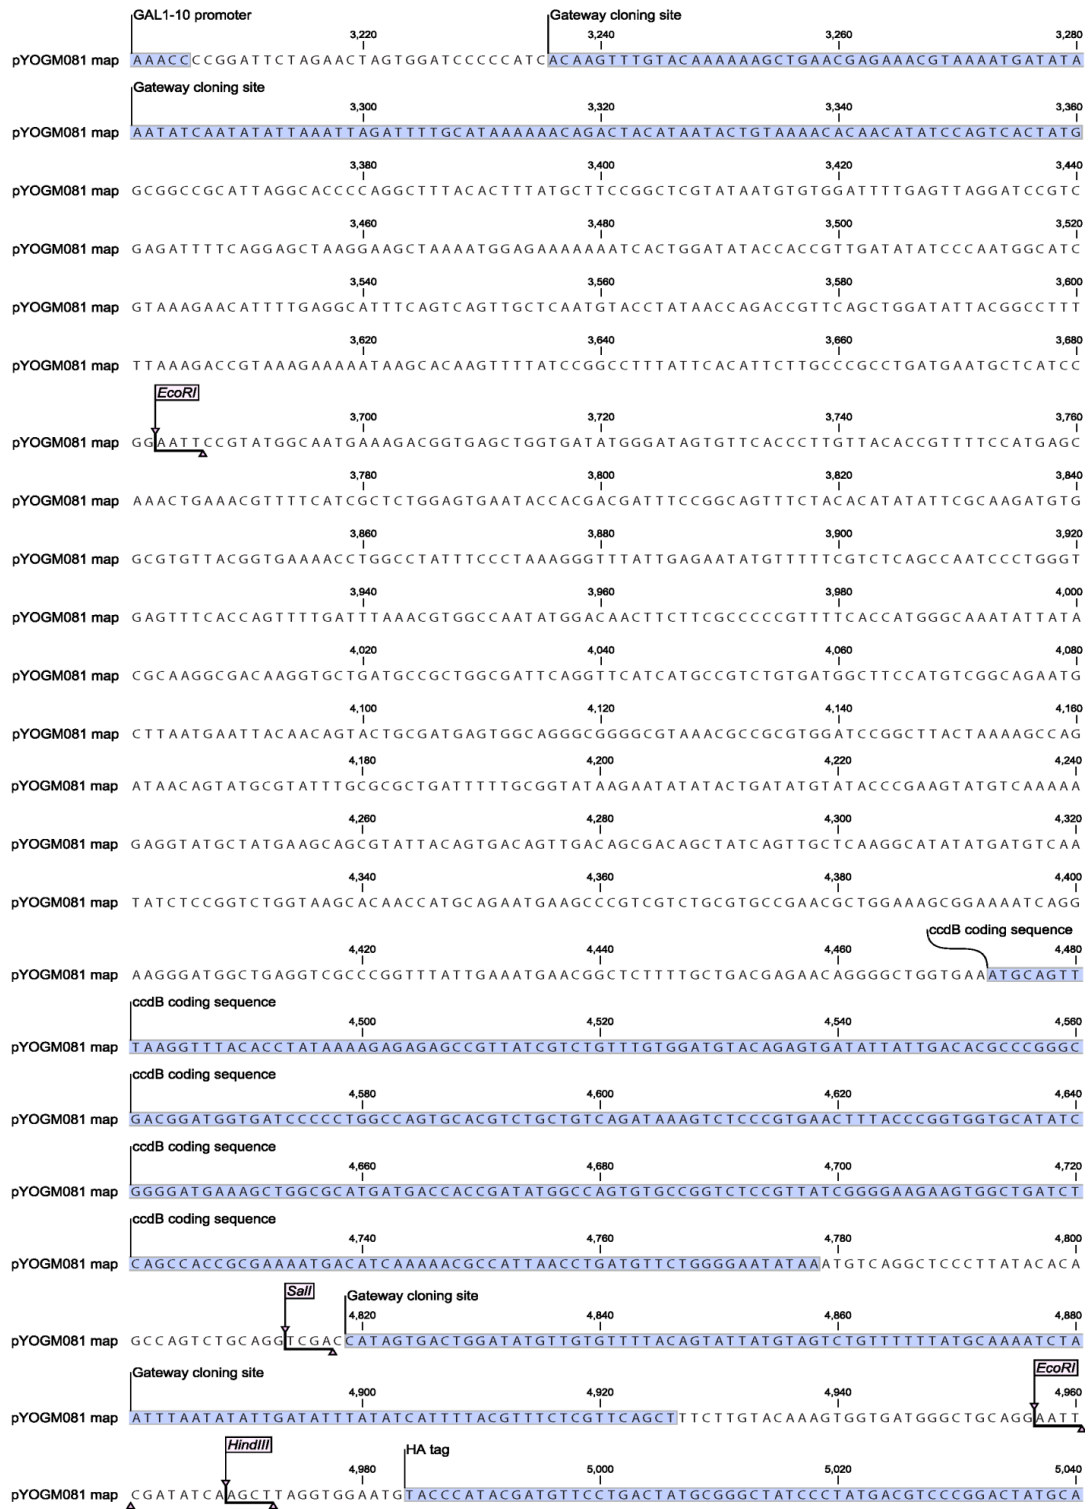

Figure S1 (continued).

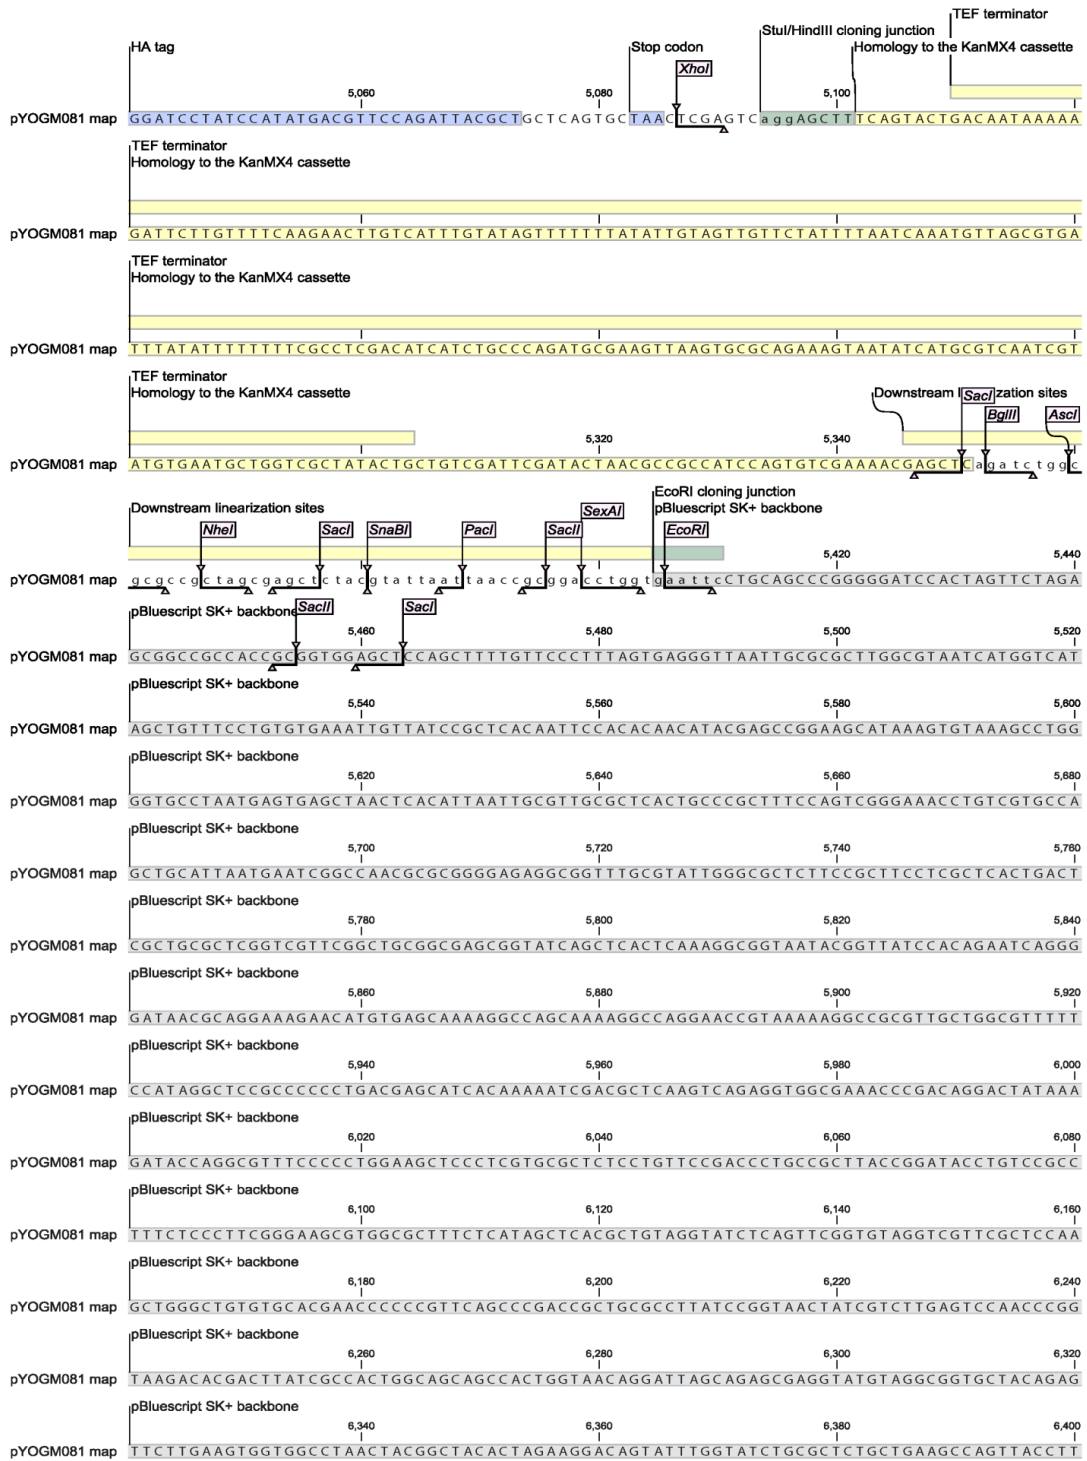

Figure S1 (continued).

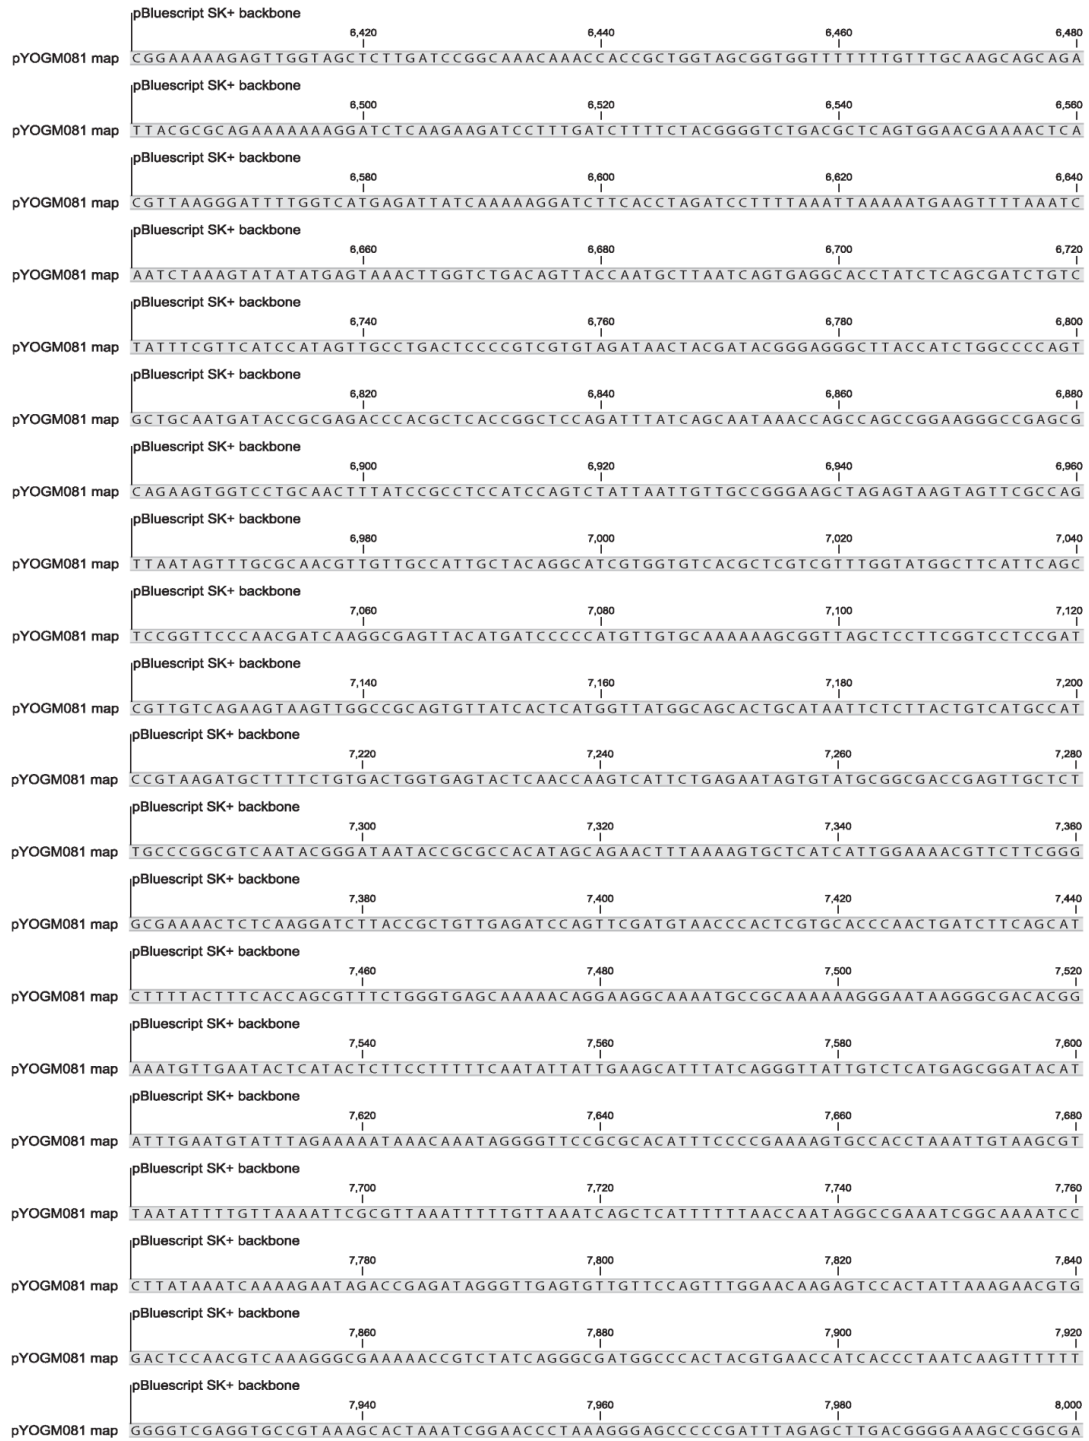

**Figure S1 (continued).**

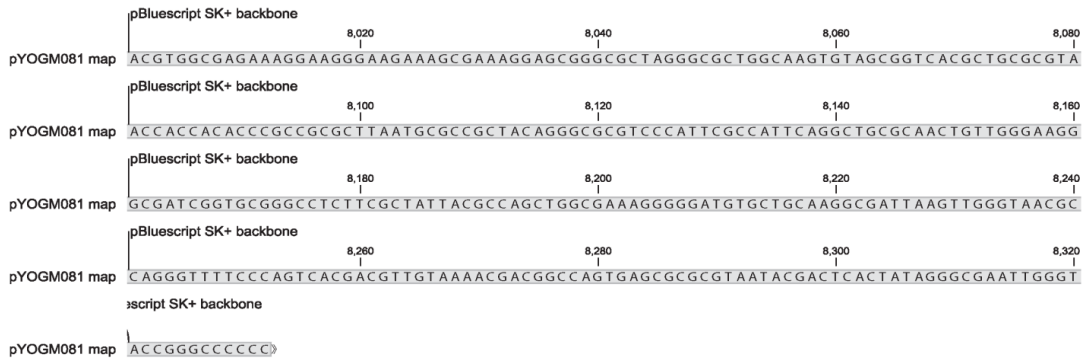

**ADH1 promoter**

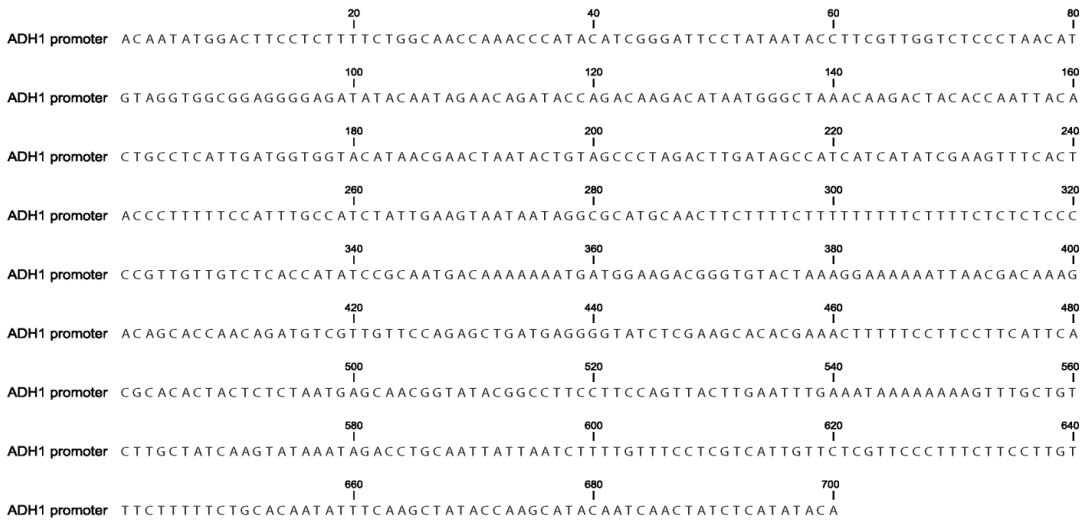

**TEF promoter**

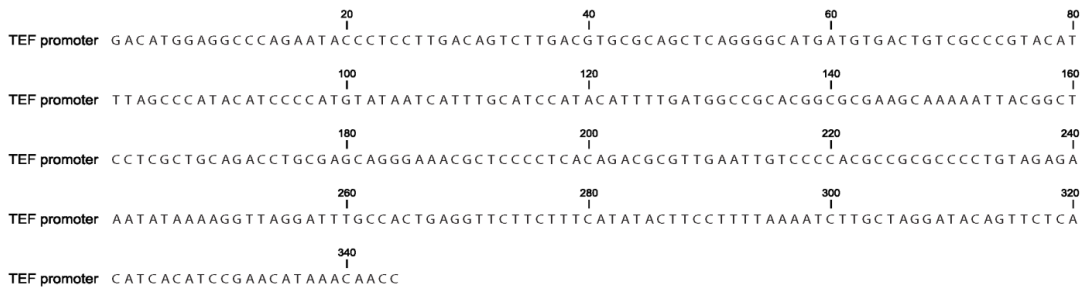

Figure S1 (continued).

**CUP1 promoter**

```

                20           40           60           80
CUP1 promoter  AACTTCAACGATTTCTATGATGCATTTTATAATTAGTAAGCCGATCCCATTACCGACATTTGGGCGCTATACGTGCATAT
                100        120        140        160
CUP1 promoter  GTTCATGTATGTATCTGTATTTAAAACACTTTTGTATTATTTTCCTCATATATGTGTATAGGTTTATACGGATGATTTA
                180        200        220        240
CUP1 promoter  ATTATTACTTCACCACCCCTTTATTTCAGGCTGATATCTTAGCCTTGTTACTAGTTAGAAAAAGACATTTTGTGTCAGT
                260        280        300        320
CUP1 promoter  CACTGTCAAGAGATTCTTTTGTGGCATTTCCTCTAGAAGCAAAAAGAGCGATGCGTCTTTTCCGCTGAACCGTTCCAGC
                340        360        380        400
CUP1 promoter  AAAAAAGACTACCAACGCAATATGGATTGTCAGAATCATATAAAAGAGAAGCAAATAACTCCTTGTCTTGTATCAATTGC
                420        440        460        480
CUP1 promoter  ATTATAATATCTTCTTGTAGTGCAATATCATATAGAAGTCATCGAAATAGATATTAAGAAAAACAACCTGTACAATCAA
                500
CUP1 promoter  TCAATCAATCATCACATAAA
```
