# Supplementary material for: The Insertion Green Monster (iGM) Method for Expression of Multiple Exogenous Genes in Yeast
Source: PubMed Central journal article supplement (PMC4455768; doi:10.1534/g3.114.010868), 2014-04-28
Supplement: supp_g3.114.010868_FigureS4.pdf [file supp_g3.114.010868_FigureS4.pdf]

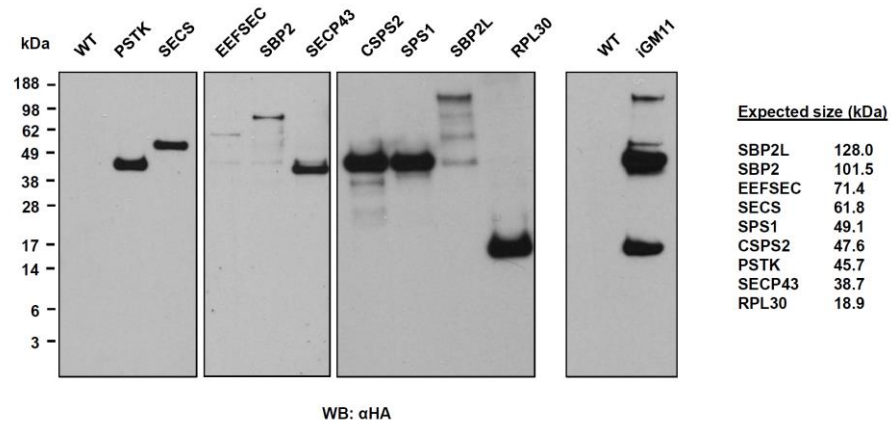

**Figure S4** Expression analysis of the exogenous genes introduced into the yeast genome using iGM method. Expression of proteins carrying HA-tag upon culture of cells in the presence of galactose was detected in individual ProMonster strains and a strain containing all of the 11 gene insertions (iGM11) by Western blotting with HA-tag specific antibodies. Expected sizes of proteins are shown on the right.
