# Supplementary material for: The Insertion Green Monster (iGM) Method for Expression of Multiple Exogenous Genes in Yeast
Source: PubMed Central journal article supplement (PMC4455768; doi:10.1534/g3.114.010868), 2014-04-28
Supplement: supp_g3.114.010868_TableS1.pdf [file supp_g3.114.010868_TableS1.pdf]

**Table S1 PCR primers used for generating a universal gene insertion module.**

| Primer sequence                                                                                                                                                                   | Template                                                                                                               |
|-----------------------------------------------------------------------------------------------------------------------------------------------------------------------------------|------------------------------------------------------------------------------------------------------------------------|
| <b>Fragment 1</b>                                                                                                                                                                 |                                                                                                                        |
| <b>1st round</b><br>5'-CAGAAGCTT(HindIII)TCAGTACTGACAATAAAAAGATTC-3'<br>5'-TAGAGCTC(SacI)GCTAGC(NheI)GGCGCGCCAGATCT(BglII)<br>GAGCTC(SacI)GTTTTCGACAC-3'                          | Template for the first round of PCR: pAG25 (Goldstein and McCusker 1999)                                               |
| <b>2nd round</b><br>5'-CAGAAGCTT(HindIII)TCAGTACTGACAATAAAAAGATTC-3'<br>5'-GGAATTC(EcoRI)ACCAGGT(SexAI)CCGCGG(SacII)TTAATTA<br>A(PacI)TACGTA(SnaBI)GAGCTC(SacI)GCTAG-3'           | To extend the downstream end, the product of the first round of PCR was used as a template for the second round of PCR |
| <b>Fragment 2</b>                                                                                                                                                                 |                                                                                                                        |
| 5'-CCGCTCGAG(XhoI)CTAGC(NheI)CGCGG(SacII)TACGTA(SnaBI)<br>CCAGGT(SexAI)GAGCTC(SacI)GACGGATCCCCGGGTAA-3'<br>5'-CCCAAGCTT(HindIII)GGGATATCGCGTCGAC(SalI)GCACGTC<br>AAGACTGTCAAGG-3' | pAG25 (Goldstein and McCusker 1999)                                                                                    |
| <b>Fragment 3</b>                                                                                                                                                                 |                                                                                                                        |
| 5'-CCGCTCGAG(XhoI)CTTTTCAATTCAATTCATC-3'<br>5'-CCCAAGCTT(HindIII)GGGATATCGCGTCGAC(SalI)GGGTAAT<br>AACTGATATAAT-3'                                                                 | pYOGM057 with the <i>URA3</i> sequence derived from pRS316 (Sikorski and Hieter 1989)                                  |
| <b>Fragment 4</b>                                                                                                                                                                 |                                                                                                                        |
| PCR was not used for this fragment                                                                                                                                                |                                                                                                                        |
| <b>Fragment 5</b>                                                                                                                                                                 |                                                                                                                        |
| 5'-GAAGGCCT(StuI)GTACGGATTAGAAGCCGCCGAG-3'<br>5'-GAAGGCCT(StuI)GACTCGAGTTAGCACTGAGC-3'                                                                                            | pAG416GAL-ccdB-HA (Alberti <i>et al.</i> 2007)                                                                         |
| <b>HA-less construct</b>                                                                                                                                                          |                                                                                                                        |
| HAless-HindIII_F 5'-GACTAAGCTT(HindIII)TCAGTACTGACAATAAAAAGATTCTTG-3'<br>HAless-HindIII_R 5'-GACTAAGCTT(HindIII)TTA(Stop)GCAGCCCATCACTTTG-3'                                      | pYOGM081                                                                                                               |
| <b>Construct with the <i>ADH1</i> promoter</b>                                                                                                                                    |                                                                                                                        |
| ADH1pr_Fwd 5'-TGCGGCCAAGCTCCTGTACAATATGGACTTCTCTTTTCTG-3'<br>ADH1pr_Rev 5'-GCTTTTTTGTACAAACTTGTGATTGTATATGAGATAGTTGATTG-3'                                                        | BY4741 genomic DNA                                                                                                     |
| ADH1pr_pYOGM081_Fwd 5'-CTATCATATACAATCACAAGTTTGTACAAAAAAGCTGAACG-3'<br>ADH1pr_pYOGM081_Rev 5'-GAGGAAGTCCATATTGTACAGGAGCTTGCCCGCAAATTAAG-3'                                        | pYOGM081                                                                                                               |
| <b>Construct with the <i>TEF</i> promoter</b>                                                                                                                                     |                                                                                                                        |
| TEFpr_Fwd 5'-TGCGGCCAAGCTCCTGTGACATGGAGGCCAGAATACCCTC-3'<br>TEFpr_Rev 5'-GCTTTTTTGTACAAACTTGTGATGGTTGTTTATGTTTCGGATGTG-3'                                                         | pFA6a-kanMX4 (Wach <i>et al.</i> 1994)                                                                                 |
| TEFpr_pYOGM081_Fwd 5'-CCGAACATAAACAACCATCACAAGTTTGTACAAAAAAGCTGAAC-3'<br>TEFpr_pYOGM081_Rev 5'-CTGGCCCTCCATGTCACAGGAGCTTGCCCGCAAATTAAGCC-3'                                       | pYOGM081                                                                                                               |
| <b>Construct with the <i>CUP1</i> promoter</b>                                                                                                                                    |                                                                                                                        |
| CUP1pr_Fwd 5'-GCTTTAATTTGCGGCCAAGCTCCTGTAACCTCAACGATTTCTATGATGC-3'<br>CUP1pr_Rev 5'-CAGCTTTTTGTACAAACTTGTGATTTTATGTGATGATTGATTG-3'                                                | BY4741 genomic DNA                                                                                                     |
| CUP1pr_pYOGM081_Fwd 5'-CAATCATCACATAAAATCACAAGTTTGTACAAAAAAGC<br>TGAACGAGAAACG-3'<br>CUP1pr_pYOGM081_Rev 5'-CATAGAAATCGTTGAAGTTACAGGAGCTTGCCCGCAAA<br>TTAAGCCTTC-3'               | pYOGM081                                                                                                               |
