# Supplementary material for: The Insertion Green Monster (iGM) Method for Expression of Multiple Exogenous Genes in Yeast
Source: PubMed Central journal article supplement (PMC4455768; doi:10.1534/g3.114.010868), 2014-04-28
Supplement: supp_g3.114.010868_TableS2.pdf [file supp_g3.114.010868_TableS2.pdf]

**Table S2 List of genotyping primers used in this study.**

| Deleted ORF    | Gene insertion | Primer sequence                                                 |
|----------------|----------------|-----------------------------------------------------------------|
| <i>YKL069W</i> | TRSP           | 5'-TAGCGACAGAGTGGTTCAATTC-3'<br>5'-TCAATTTGGCGAACAGGGAATG-3'    |
| <i>YER042W</i> | PSTK           | 5'-AGTGTTGCAGAATCGAGAAGAG-3'<br>5'-TCATAAATAAGGGCACGTACAC-3'    |
| <i>YOL118C</i> | SECS           | 5'-ACACATACCAGGATGCTTCTTC-3'<br>5'-GCTGACTAATTTGAAGCTATCG-3'    |
| <i>YLR123C</i> | SPS1           | 5'-ACAGCCAGAATCATAGACAAAC-3'<br>5'-TTCAGCTGATGTGCCATGTAAC-3'    |
| <i>YER108C</i> | SPS2           | 5'-GATGTTAAGTCTTTTGCGGCAG-3'<br>5'-AAAGTCGTTGCTGTGAAAATGG-3'    |
| <i>YCL033C</i> | SBP2           | 5'-AAGAATCCTTGGAGGCTTCAAC-3'<br>5'-GTCCACGATCTCAAACCTTTC-3'     |
| <i>YKR012C</i> | SBP2L          | 5'-TTACACAACGCAAACACTACGTAC-3'<br>5'-TTAGGACCATCTTGCAATTTGAG-3' |
| <i>YDL242W</i> | EEFSEC         | 5'-TCAAGCGTTATGTCTTCGCACAC-3'<br>5'-GTTTCGATATTCGCACATTTGC-3'   |
| <i>YGL109W</i> | SECP43         | 5'-ACAAGGAGTTCATGGAACAGAG-3'<br>5'-CAACTAAAGAGTACAACGTCC-3'     |
| <i>YFR057W</i> | RPL30          | 5'-CTCTGACATCATTAGAAGCATG-3'<br>5'-AGATAACTCTGAACTGTGCATC-3'    |
| <i>YDL227C</i> | cSPS2          | 5'-CTCTGTTCCCTCTCATATTTAC-3'<br>5'-CTACTCCAGCATTCTAGTTAAG-3'    |

**SUPPLEMENTARY REFERENCES**

- Alberti, S., A. D. Gitler, and S. Lindquist, 2007 A suite of Gateway cloning vectors for high-throughput genetic analysis in *Saccharomyces cerevisiae*. *Yeast* 24: 913-919.
- Goldstein, A. L., and J. H. McCusker, 1999 Three new dominant drug resistance cassettes for gene disruption in *Saccharomyces cerevisiae*. *Yeast* 15: 1541-1553.
- Sikorski, R. S., and P. Hieter, 1989 A system of shuttle vectors and yeast host strains designed for efficient manipulation of DNA in *Saccharomyces cerevisiae*. *Genetics* 122: 19-27.
- Wach, A., A. Brachat, R. Pohlmann, and P. Philippsen, 1994 New heterologous modules for classical or PCR-based gene disruptions in *Saccharomyces cerevisiae*. *Yeast* 10: 1793-1808.
